# Supplementary material for: Mass Spectrometry-Based Network Analysis Reveals New Insights Into the Chemodiversity of 28 Species in Aspergillus section Flavi
Source: Front Fungal Biol. 2021 Aug 11;2:719420. doi: 10.3389/ffunb.2021.719420 (PMC10512371; doi:10.3389/ffunb.2021.719420)
Supplement: Supplementary file 1 [file Data_Sheet_1.docx]

**Supplementary Information**

**Table of contents**

**Supplementary Table S1**: Overview of the fungal strains used in this study.

**Supplementary** **Table S2:** The overall dereplicated compounds in this study.

**Supplementary** **Figure S1:** Cluster F represents the nodes of detected miyakamides.

**Supplementary** **Figure S2:** The nodes with dark red outline represent the species-specific metabolites, which are only produced by *Aspergillus* *aspearensis*.

**Supplementary** **Figure S3:** High resolution MS/MS spectra of aflatoxins at 20 eV.

**Supplementary** **Figure S4:** High resolution MS/MS spectra of ochratoxins at 20 eV.

**Supplementary** **Figure S5:** High resolution MS/MS spectra of cyclopiazonic acids at 20 eV.

**Supplementary Figure S6:** High resolution MS/MS spectra of aflatrems and aflavinines at 20 eV.

**Supplementary Figure S7:** High resolution MS/MS spectra of fumifungins at 20 eV.

**Supplementary** **Figure S8:** High resolution MS/MS spectra of tenuazonic acids at 20 eV.

**Supplementary** **Figure S9:** High resolution MS/MS spectra of aspergillicins at 40 eV.

**Supplementary** **Figure S10:** High resolution MS/MS spectra of miyakamides at 20 eV.

**Supplementary** **Figure S11:** High resolution MS/MS spectra of some representative metabolites at 20 eV.

**Table S1**. Overview of the fungal strains used in this study.

| Series | Species | Isolate number |
| --- | --- | --- |
| *Flavi* | *Aspergillus sojae* | IBT 21650 |
| *Flavi* | *A.pipericola* | IBT 24628 |
| *Flavi* | *A.oryzae* | IBT 28103 |
| *Flavi* | *A.flavus* | IBT 29624 |
| *Flavi* | *A.cerealis* | IBT 32067 |
| *Flavi* | *A.austwickii* | IBT 32076 |
| *Flavi* | *A.subflavus* | IBT 33354 |
| *Flavi* | *A.aflatoxiformans* | IBT 3651 |
| *Flavi* | *A.parasiticus* | IBT 27186 |
| *Flavi* | *A.arachidicola* | IBT 27190 |
| *Flavi* | *A.minisclerotigenes* | IBT 27196 |
| *Flavi* | *A.sergii* | IBT 32293 |
| *Flavi* | *A.transmontanensis* | IBT 32313 |
| *Flavi* | *A.novoparasiticus* | IBT 32314 |
| *Kitamyces* | *A.pseudotamarii* | IBT 21090 |
| *Kitamyces* | *A.caelatus* | IBT 21091 |
| *Kitamyces* | *A.tamarii* | IBT 27182 |
| *Kitamyces* | *A.pseudocaelatus* | IBT 27191 |
| *Nomiarum* | *A.pseudonomius* | IBT 27864 |
| *Nomiarum* | *A.nomius* | IBT 5054 |
| *Nomiarum* | *A.luteovirescens* | IBT 23536 |
| *Alliacei* | *A.alliaceus* | IBT 13376 |
| *Alliacei* | *A.vandermerwei* | IBT 13865 |
| *Alliacei* | *A.albertensis* | IBT 14317 |
| *Alliacei* | *A.neoalliaceus* | IBT 33356 |
| *Leporum* | *A.leporis* | IBT 3609 |
| *Leporum* | *A.aspearensis* | IBT 34544 |
| *Leporum* | *A.hancockii* | IBT 35031 |

**Table S2**. The overall dereplicated compounds in this study. The compounds highlighted in green color are dereplicated by the GNPS library. The compounds marked with asterisk are found by the in-house library reseach; and the compounds highlight in yellow are the important mycotoxins for which standards have been used for generation of reference spectra for molecular network analysis.

| **Compounds number** | **Network clusters** | **Compounds name** | **Molecular Formula** | **m/z** | **Mass (MFG*)** |
| --- | --- | --- | --- | --- | --- |
| 1 | Aflatoxins | **aflatoxin B1*** | C17H12O6 | 313.0707 | 312.0634 |
| 2 | **aflatoxin B3*** | C16H14O6 | 303.0864 | 302.0791 |
| 3 | **aflatoxin G1*** | C17O7H12 | 329.0655 | 328.0586 |
| 4 | **aflatoxin GM2** | C17O8H14 | 347.0762 | 346.0689 |
| 5 | **O-methylsterigmatocystin** | C19O6H14 | 339.0872 | 338.079 |
| 6 | **Dihydroaflatoxicol** | C16O7H12 | 317.0657 | 316.0583 |
| 7 | Ochratoxins | **Ochratoxin A*** | C20H18ClNO6 | 404.0898 | 403.0826 |
| 8 | **Ochratoxin B*** | C20NO6H19 | 370.1291 | 369.1218 |
| 9 | **Ochratoxin beta** | C11H10O5 | 223.0605 | 222.0528 |
| 10 | **CTKSE9855** | C20H19NO7 | 386.1239 | 385.1162 |
| 11 | Cyclopiazonic acids | **Cyclopiazonic acid *** | C20N2O3H20 | 337.1552 | 336.148 |
| 12 | **Speradine A*** | C21N2O4H22 | 367.1656 | 366.1585 |
| 13 | **2-oxo-cyclopiazonic acid** | C20N2O4H20 | 353.1502 | 352.1423 |
| 14 | **3-OH-speradine A** | C21N2O5H22 | 383.161 | 382.1529 |
| 15 | **speradine F** | C22N2O6H26 | 415.186 | 414.1791 |
| 16 | Fumifungins | **Fumifungin*** | C22H41NO7 | 432.2953 | 431.288 |
| 17 | **Sphingofungin B** | C20H39NO6 | 390.2854 | 389.2777 |
| 18 | **Sphingofungin C** | C22H41NO7 | 432.2965 | 431.2883 |
| 19 | **Sphingofungin D** | C22H41NO7 | 432.2969 | 431.2883 |
| 20 | Aflatrems | **Aflatrem*** | C32NO4H39 | 502.2956 | 501.2881 |
| 21 | **Paspalinine*** | C27NO4H31 | 434.2328 | 433.2255 |
| 22 | **Paspaline** | C28NO2H39 | 422.3057 | 421.2981 |
| 23 | **Hydroxypaspalinine** | C27H31NO5 | 450.2272 | 449.2202 |
| 24 | **Penerpenes** | C27H31NO5 | 450.2276 | 449.2202 |
| 25 | **Asperindoles** | C29NO6H33 | 492.2390 | 491.2321 |
| 26 | Aflavinines | **14-hydroxyaflavinine** | C28NO2H39 | 422.3051 | 421.2981 |
| 27 | **Aflavinine** | C28NOH39 | 406.3098 | 405.3032 |
| 28 | **Dihydroxyaflavinine** | C28NO3H39 | 438.3004 | 437.2930 |
| 29 | Tenuazonic acids | **Tenuazonic acid*** | C10NO3H15 | 198.1128 | 197.1055 |
| 30 | **Valine-tenuazonic acid*** | C9H13NO3 | 184.0964 | 183.0891 |
| 31 | Aspergillicins | **Aspergillicin A** | C38N6O9H56 | 763.4004 | 740.4109 |
| 32 | **Aspergillicin B** | C37N6O9H54 | 749.384 | 726.3952 |
| 33 | **Aspergillicin C** | C37N6O8H54 | 733.3905 | 710.4003 |
| 34 | **Aspergillicin G** | C38N6O8H56 | 747.4066 | 724.416 |
| 35 | **Aspergillicin E/F** | C39N6O9H58 | 777.4161 | 754.4265 |
| 36 | Miyakamides | **Miyakamide A1*/A2*** | C31N4O3H32 | 509.2551 | 508.2482 |
| 37 | **Miyakamide B1*/B2** | C31N4O4H32 | 525.2497 | 524.2431 |
| 38 | **Miyakamide analogues with Valine** | C27N4O3H32 | 461.2552 | 460.2474 |
| 39 | **aspergillamide A/B** | C28H34N4O3 | 497.2533 | 474.2631 |
| 40 | **Oryzamide A1/A2** | C28N4O4H34 | 513.2481 | 490.258 |
| 41 |  | **Ditryptophenaline*** | C42N6O4H40 | 693.3192 | 692.3117 |
| 42 |  | **aspergillic acid*** | C12N2O2H20 | 225.16 | 224.1527 |
| 43 |  | **desertorin A*** | C22H18O8 | 411.1075 | 410.1002 |
| 44 |  | **desertorin B** | C23H20O8 | 425.1238 | 424.1158 |
| 45 |  | **Ergokonin B*** | C28H42O5 | 481.2924 | 458.3032 |
| 46 |  | **13-Dehydroxypaxilline*** | C27H33NO3 | 420.2532 | 419.2459 |
| 47 |  | **Kojic acid*** | C6O4H6 | 143.0338 | 142.0265 |
| 48 |  | **Phytosphingosine*** | C18H39NO3 | 318.3001 | 317.2928 |
| 49 |  | **(-)-Canadensolide*** | C11O4H14 | 211.0966 | 210.0892 |
| 50 |  | **Chrysogine*** | C10N2O2H10 | 191.0816 | 190.0743 |
| 51 |  | **Parasiticolide A*** | C26O8H30 | 493.1838 | 470.1946 |
| 52 |  | **ustilaginoidin C*** | C28O12H18 | 547.0878 | 546.0804 |
| 53 |  | **Sterigmatocystin** | C18H12O6 | 325.0707 | 324.0623 |
| 54 |  | **Lovastatin / mevinolin** | C24H36O5 | 427.2460 | 404.2563 |
| 55 |  | **Lovastatin acid** | C24H38O6 | 445.2563 | 422.2668 |
| 56 |  | **Lovastatin analogue** | C24H40O6 | 447.2723 | 424.2825 |
| 57 |  | **TMC-95A** | C33N6O10H38 | 679.2733 | 678.2649 |
| 58 |  | **Deacetylparasiticolide A** | C24H28O7 | 429.1910 | 428.1835 |
| 59 |  | **Heptelidic acid** | C15O5H20 | 281.1387 | 280.1311 |
| 60 |  | **Flavacol** | C12N2OH21 | 209.1650 | 208.1576 |

*This column shows that the results was found by the Generate Formulas algorithm (MGF) in MassHunter.


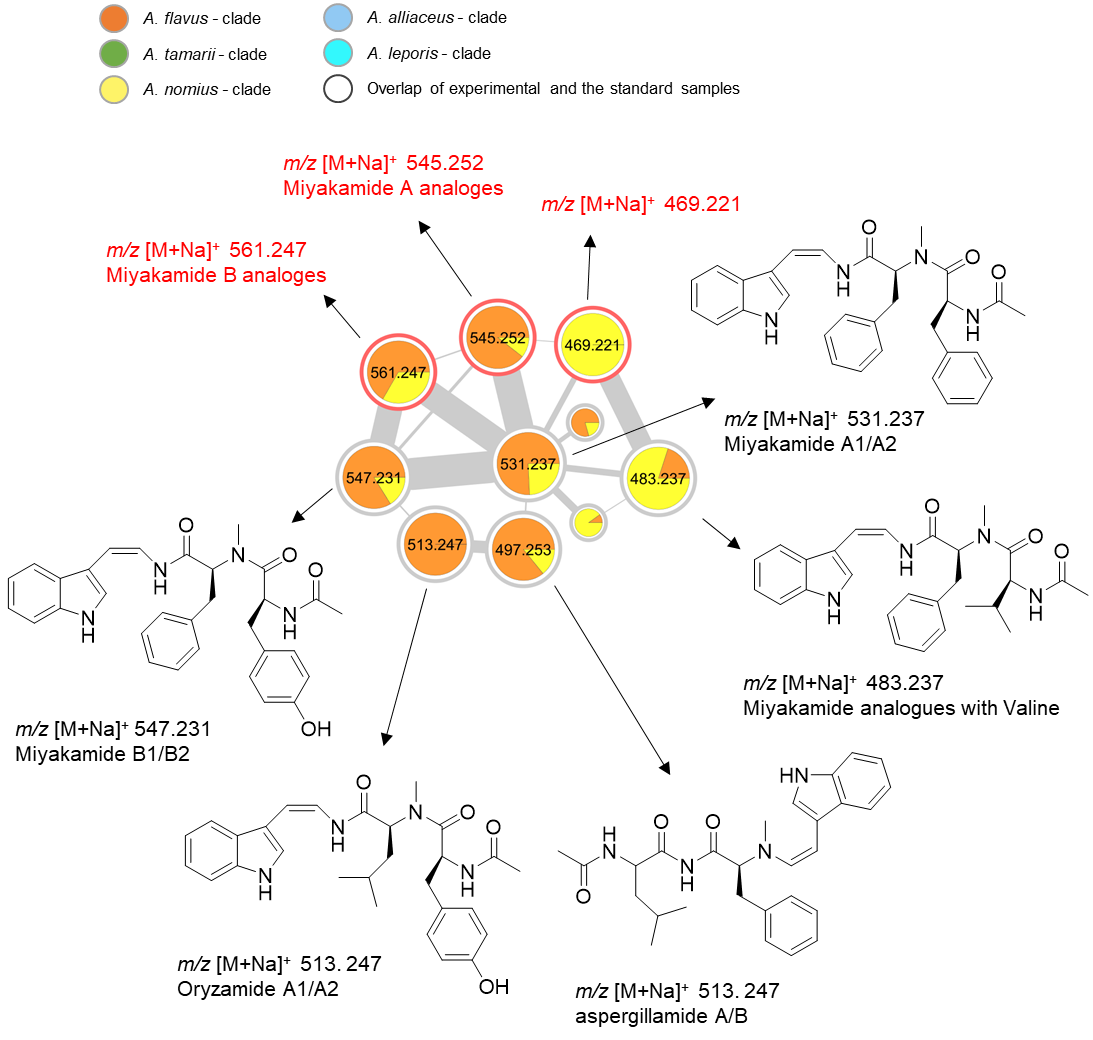


**F**

**Figure S1**. Cluster F represents the nodes of detected miyakamides. The nodes with red outline represent the potentially novel compounds.

In the cluster F (**Figure S1**), Miyakamides were dereplicated manually. They were first isolated from the cultured broth of *Aspergillus flavus* strain and showed inhibitory activity against brine shrimp**.** The map of molecular network shows that Miyakamide A1/A2 is produced by *A. sojae, A. nomius, A. parasitiicus, A. novoparasiticus* and *A. transmontanensis*, and that Miyakamide B1/B2 is produced by *A. sojae, A. nomius, A. novoparasiticus* and *A. transmontanensis*. In addition, the node of miyakamide A (m/z 531) is connected to the precursor mass of m/z 483 with the cosine score of 0.74, a difference of 48 amu less than miyakamide A, suggests the presence of a valine fragment instead of a phenylalanine fragment in the molecule. This is confirmed by checking fragmentation patterns of both compounds. Moreover, Oryzamide A1/A2 and aspergillamide A/B were also identified in MN.


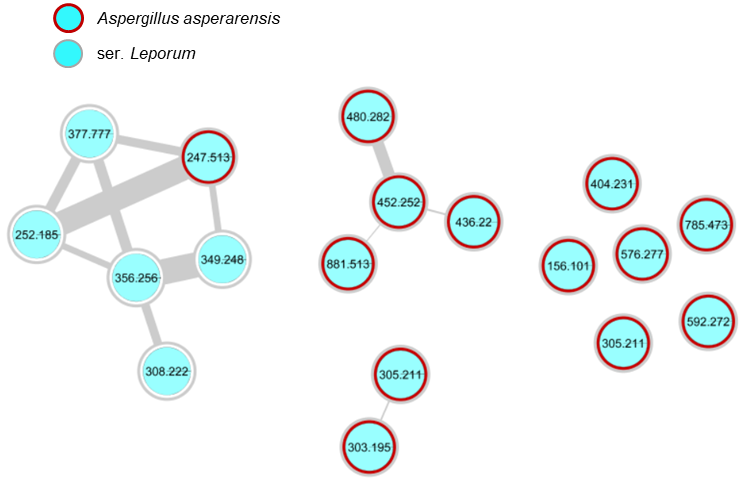


**Figure S2**. The nodes with dark red outline represent the species-specific metabolites, which are only produced by *Aspergillus aspearensis*; the nodes with gray outline represent the series-specific metabolites, which are only produced by series *Leporum*.


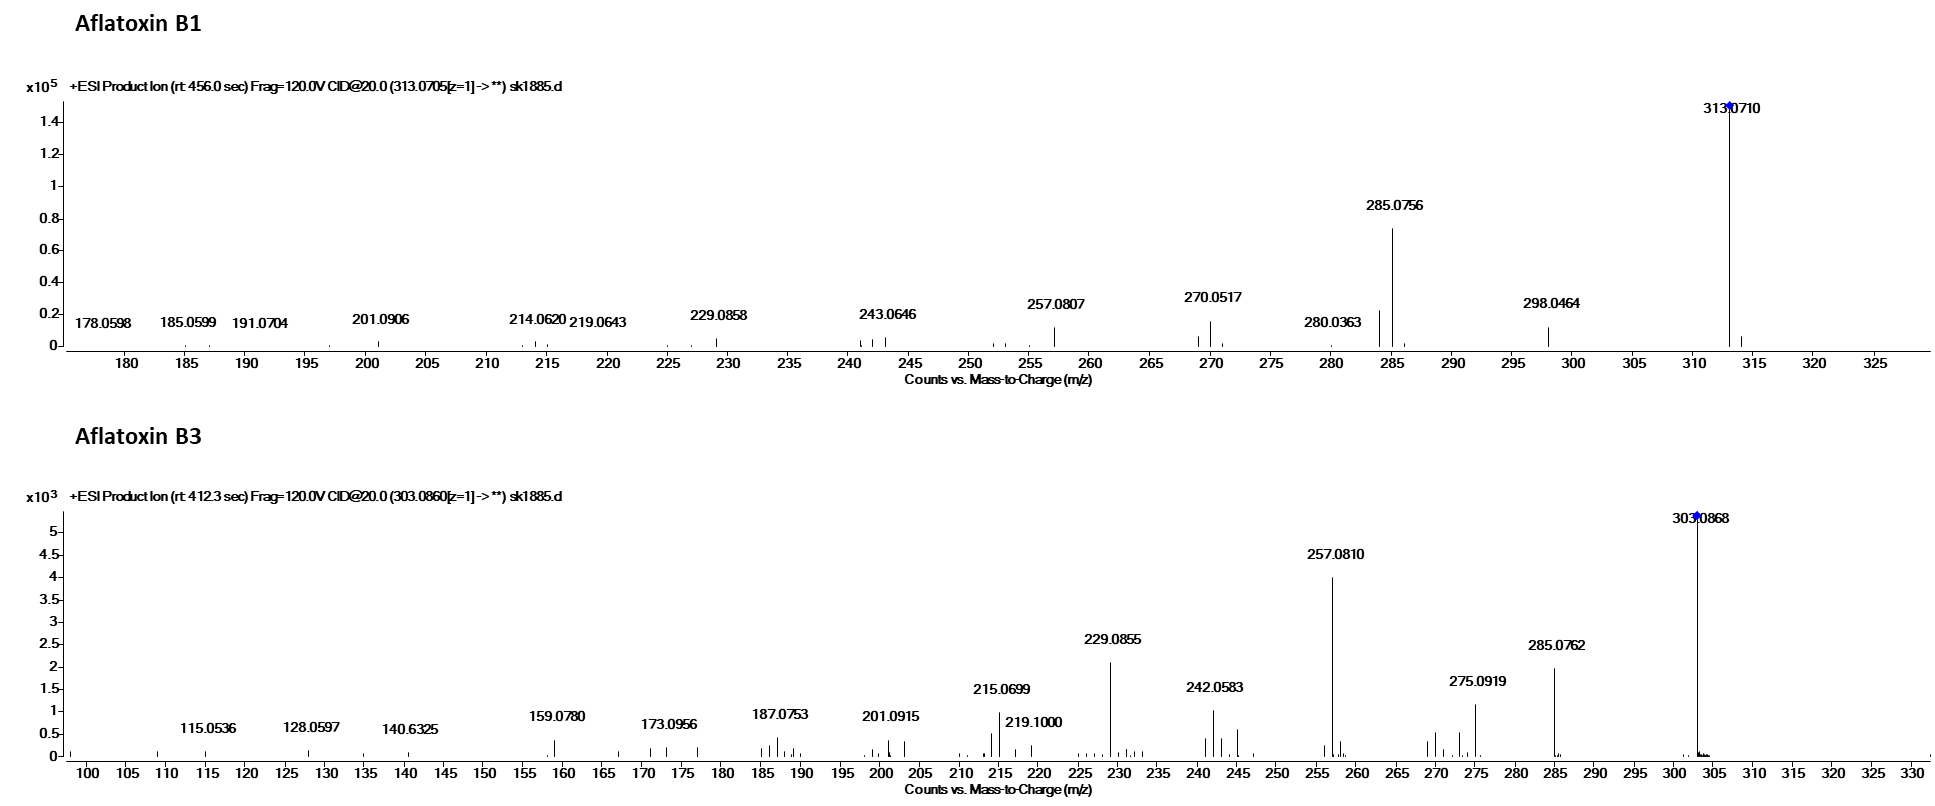


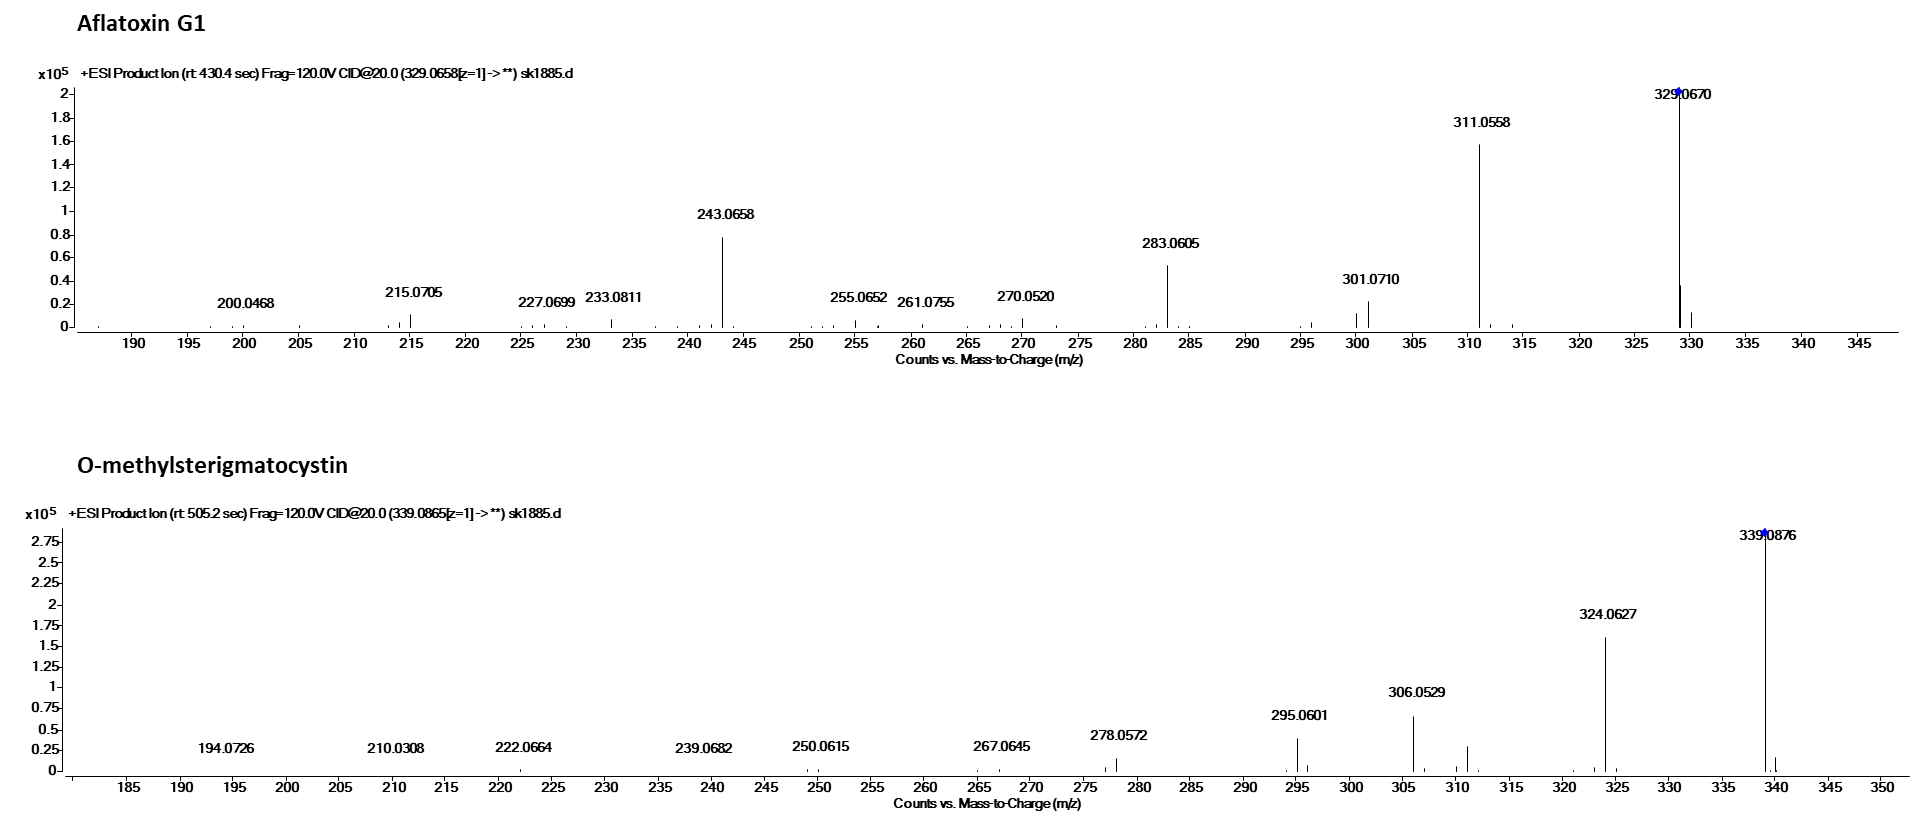


**Figure S3.** High resolution MS/MS spectra of aflatoxins at 20 eV.


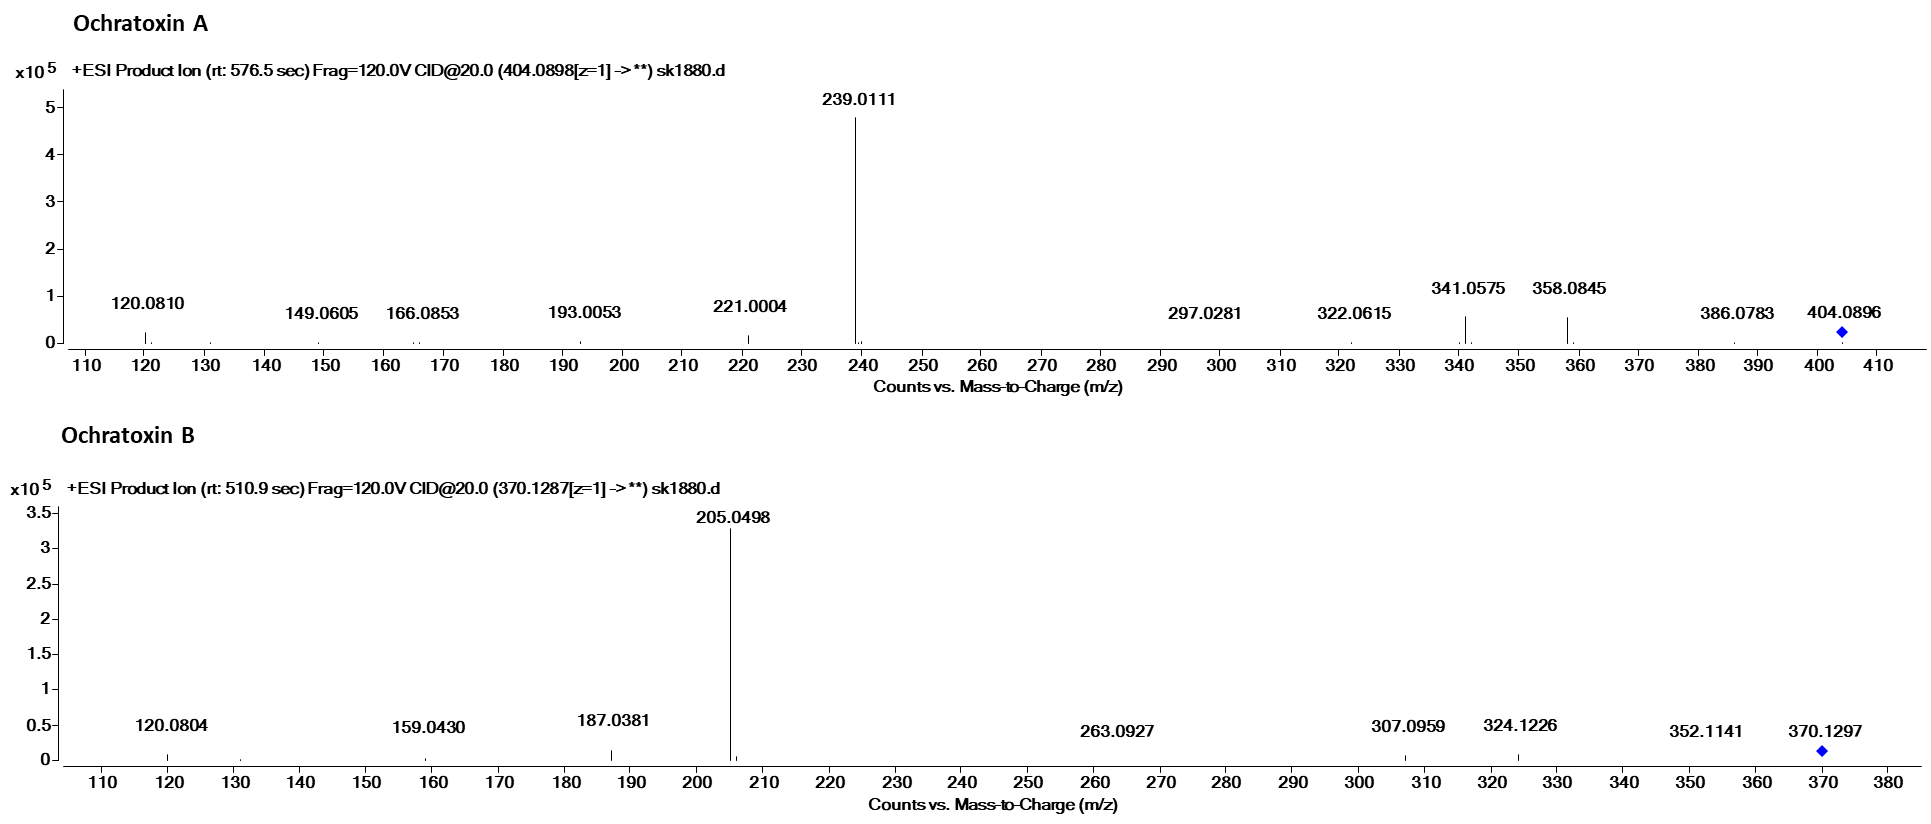


**Figure S4.** High resolution MS/MS spectra of ochratoxins at 20 eV.


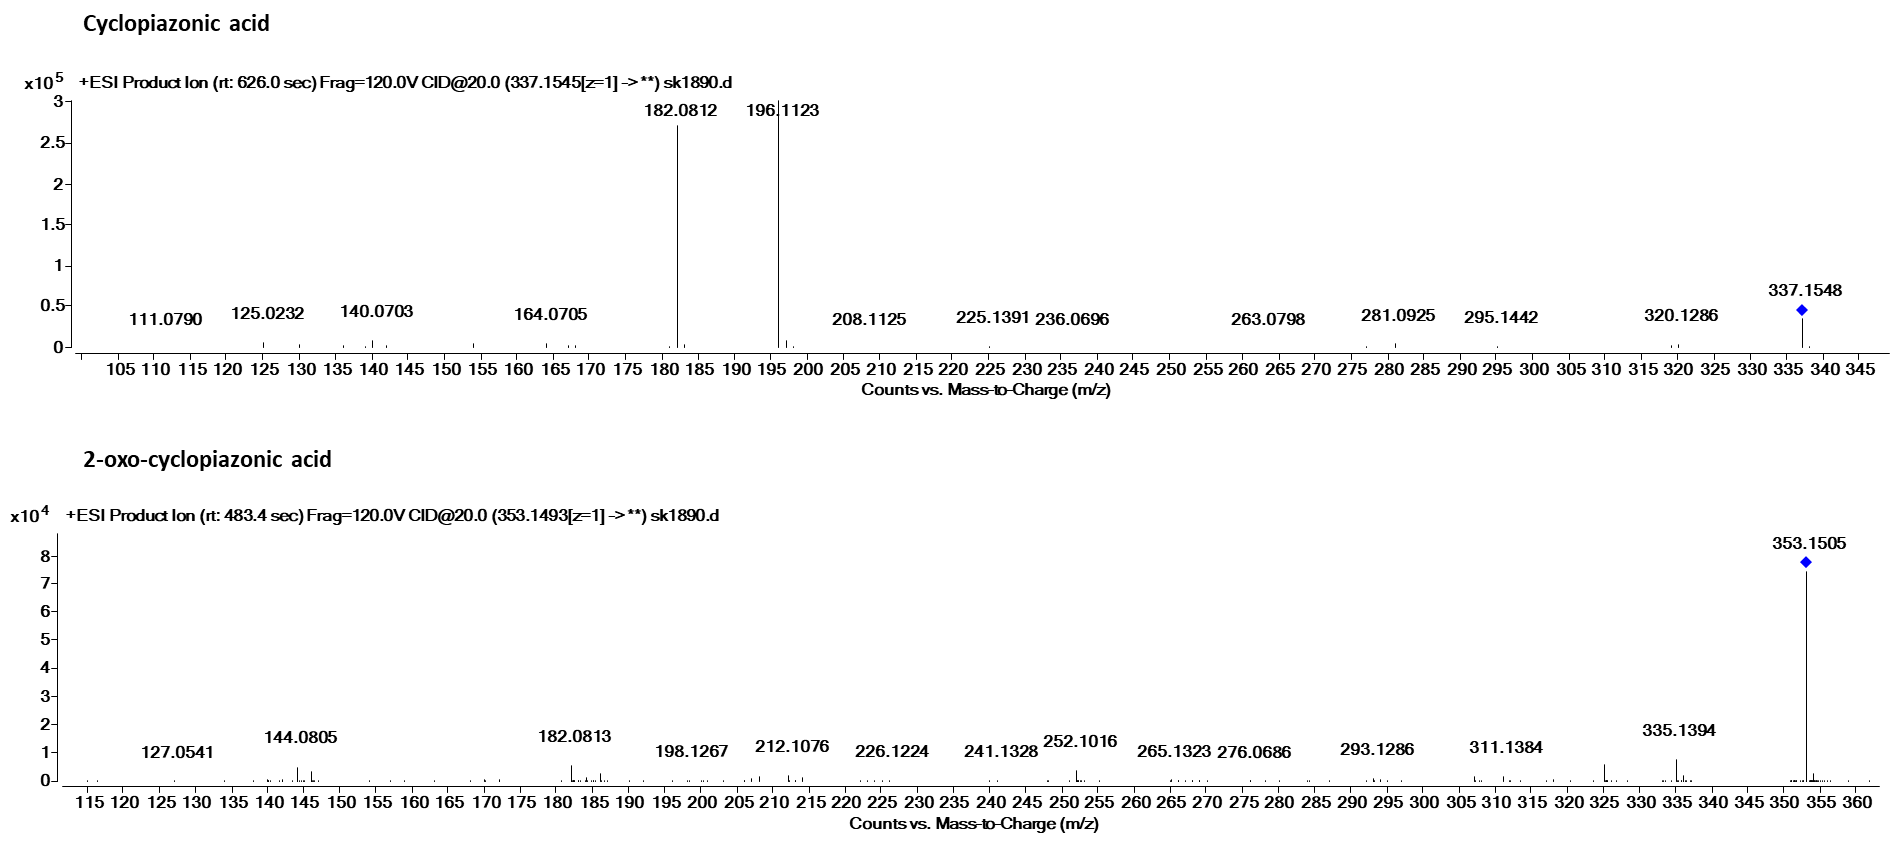


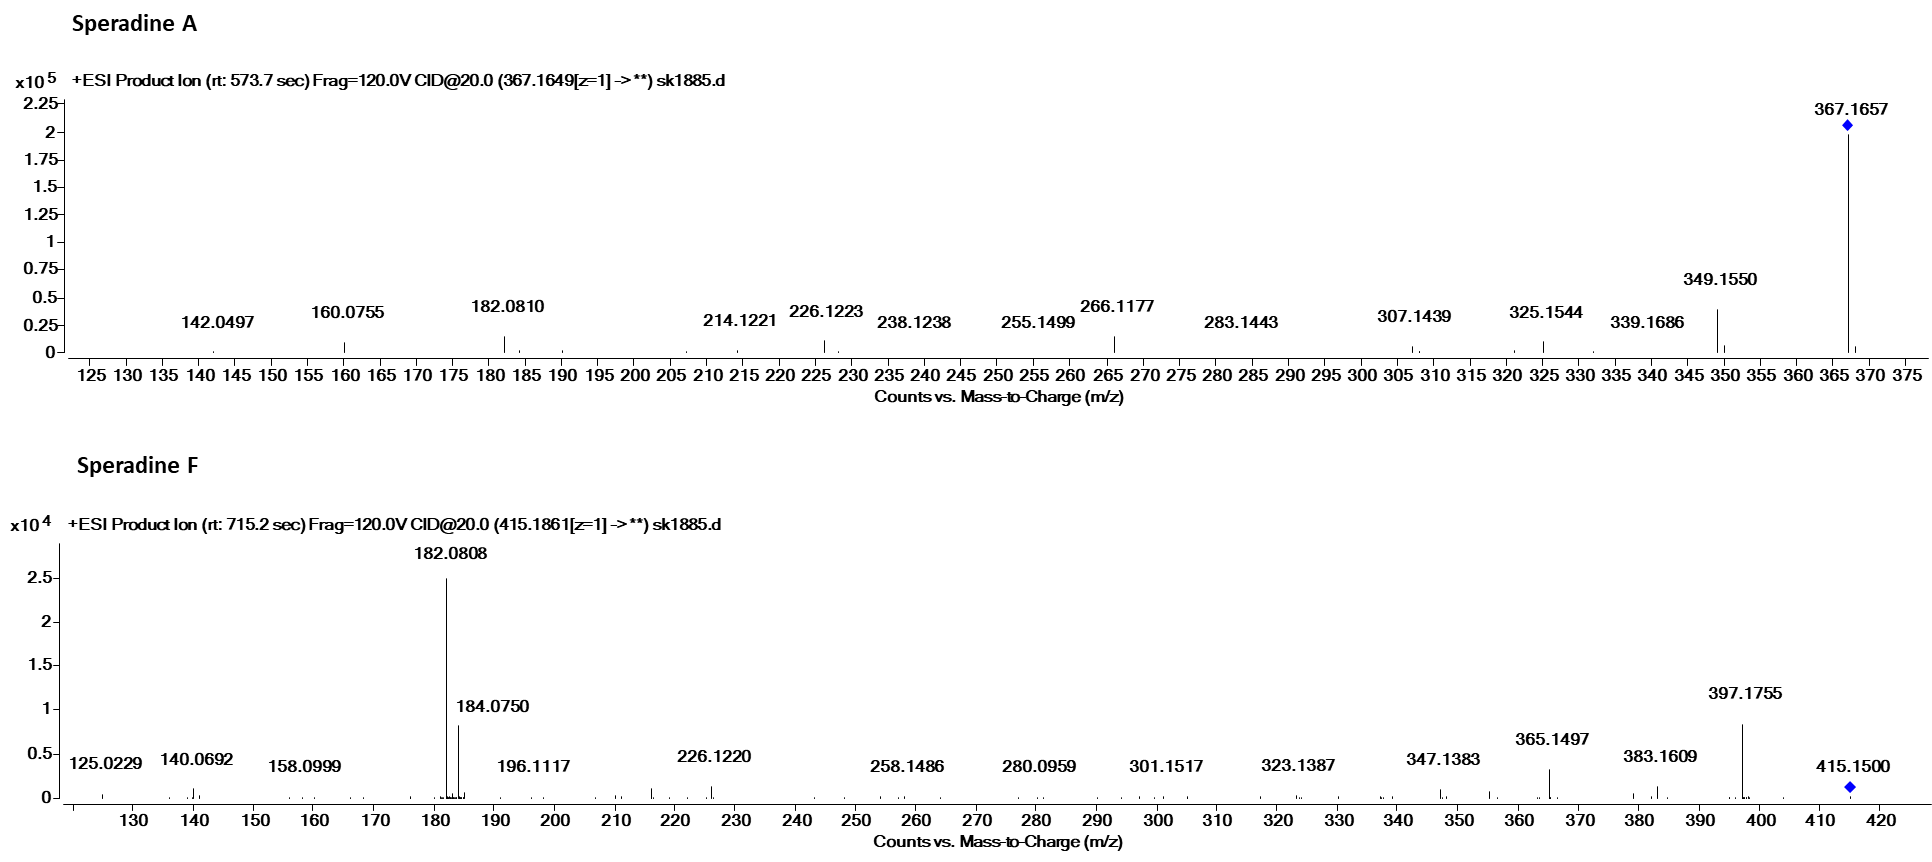


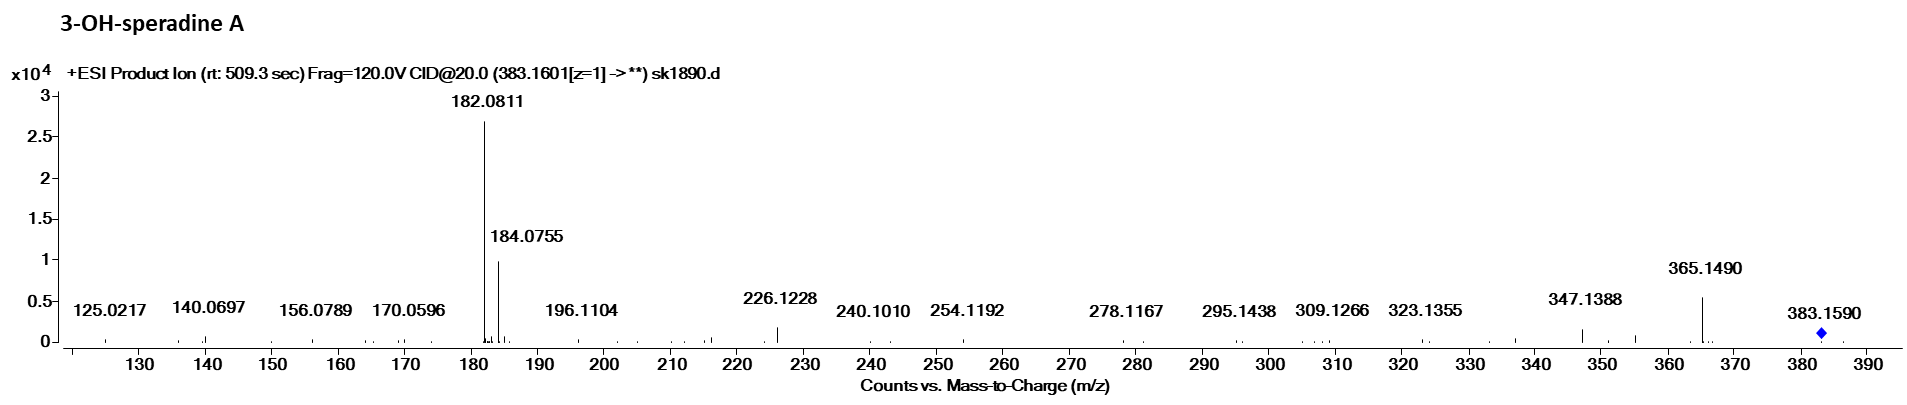


**Figure S5.** High resolution MS/MS spectra of cyclopiazonic acids at 20 eV.


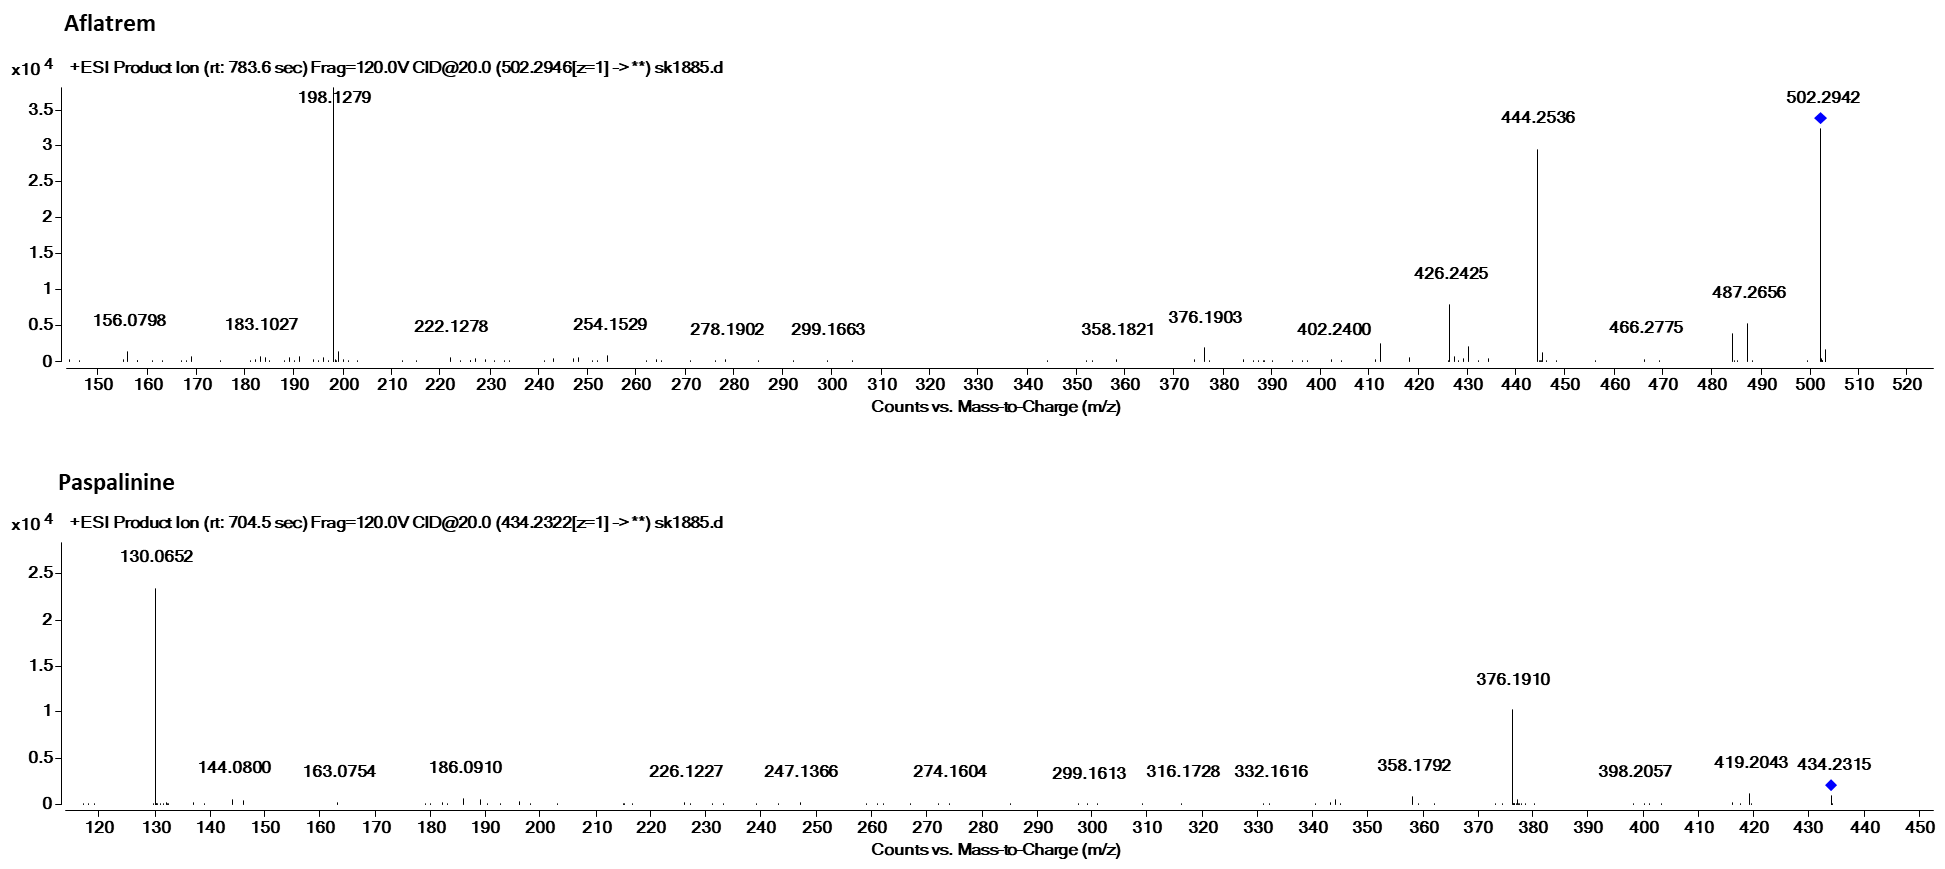


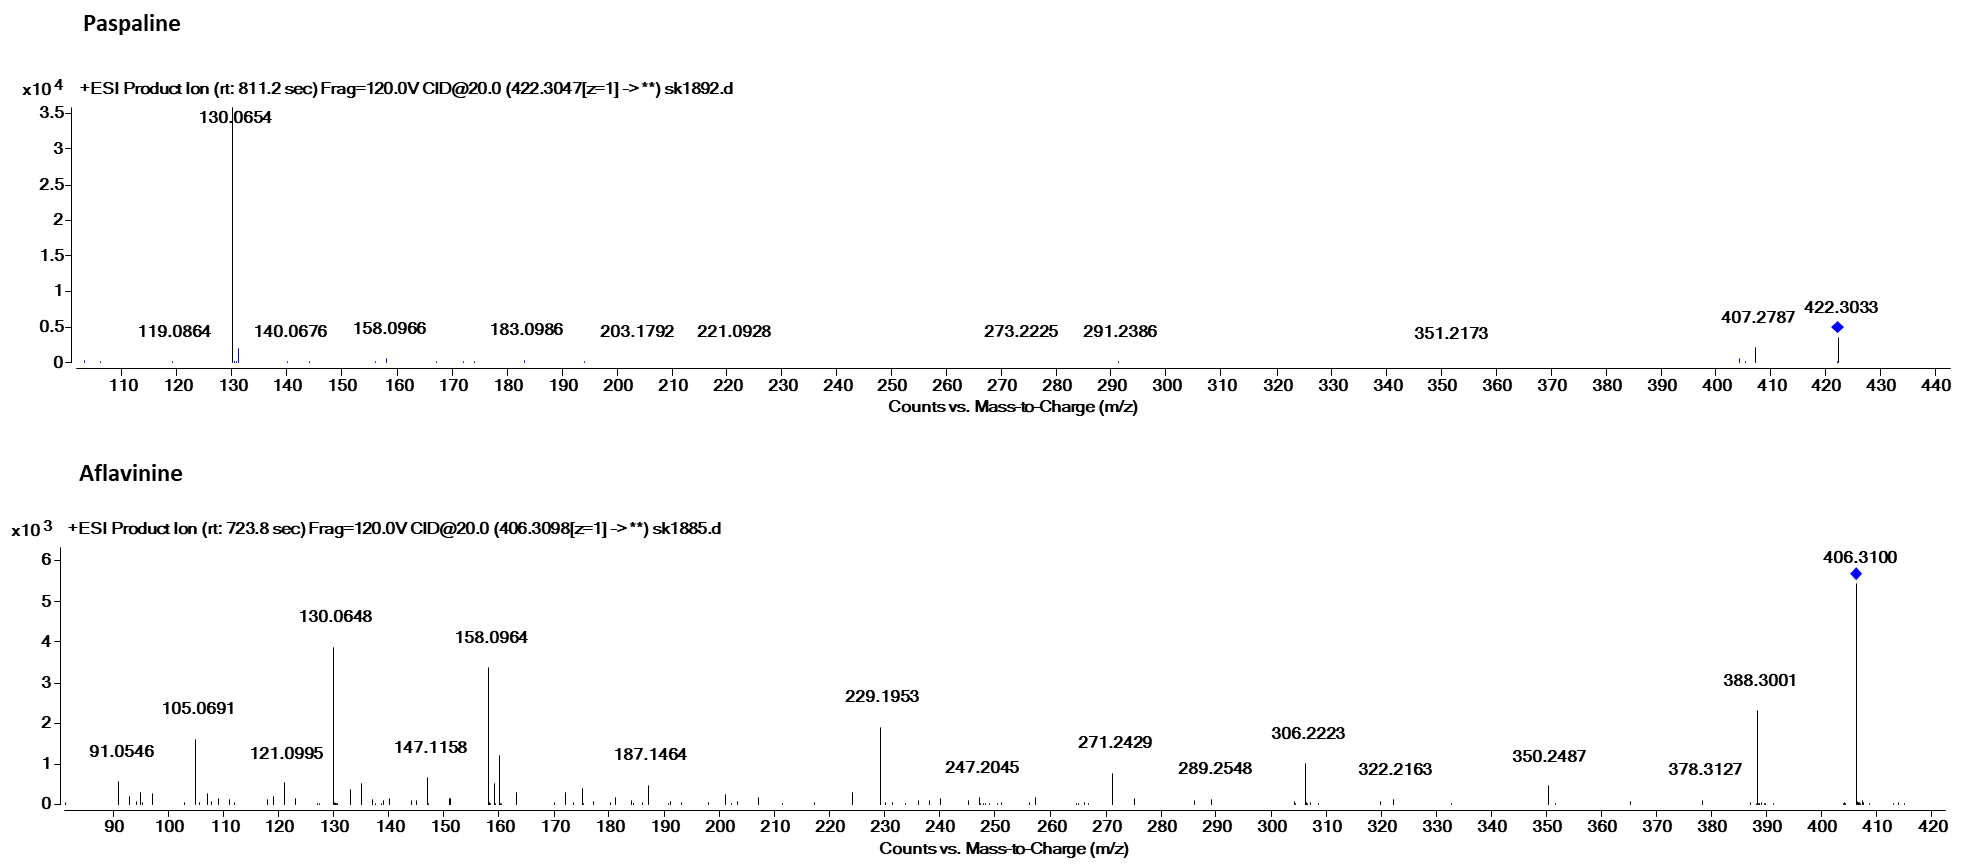


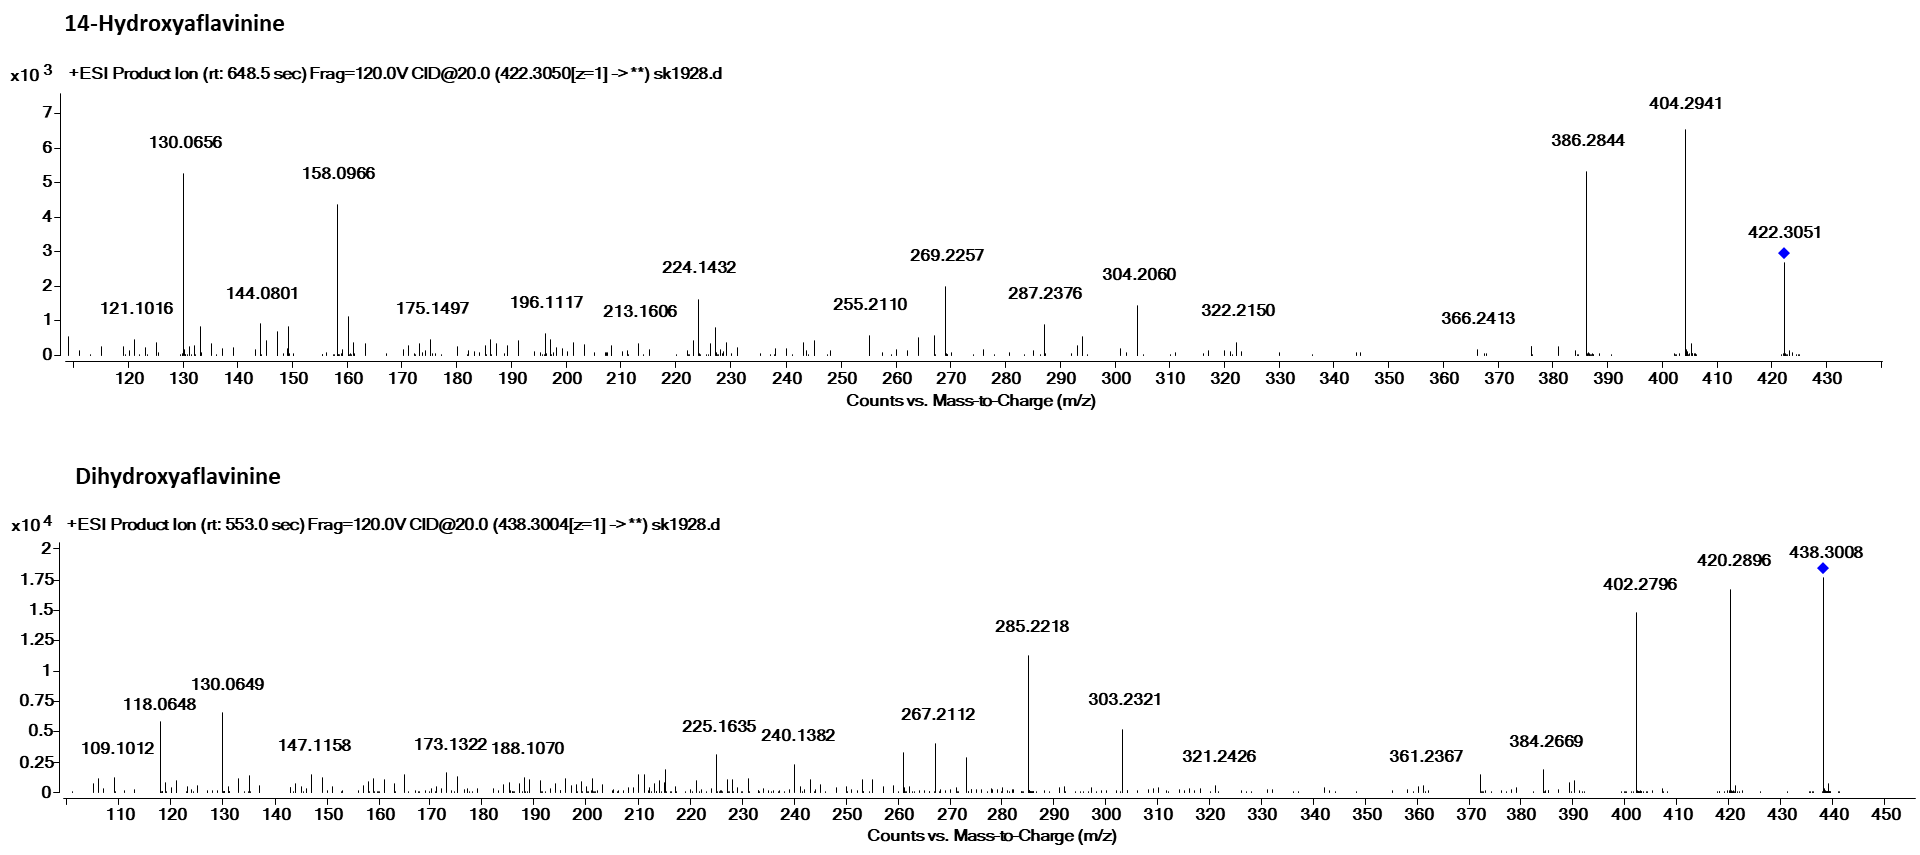


**Figure S6.** High resolution MS/MS spectra of aflatrems and aflavinines at 20 eV.


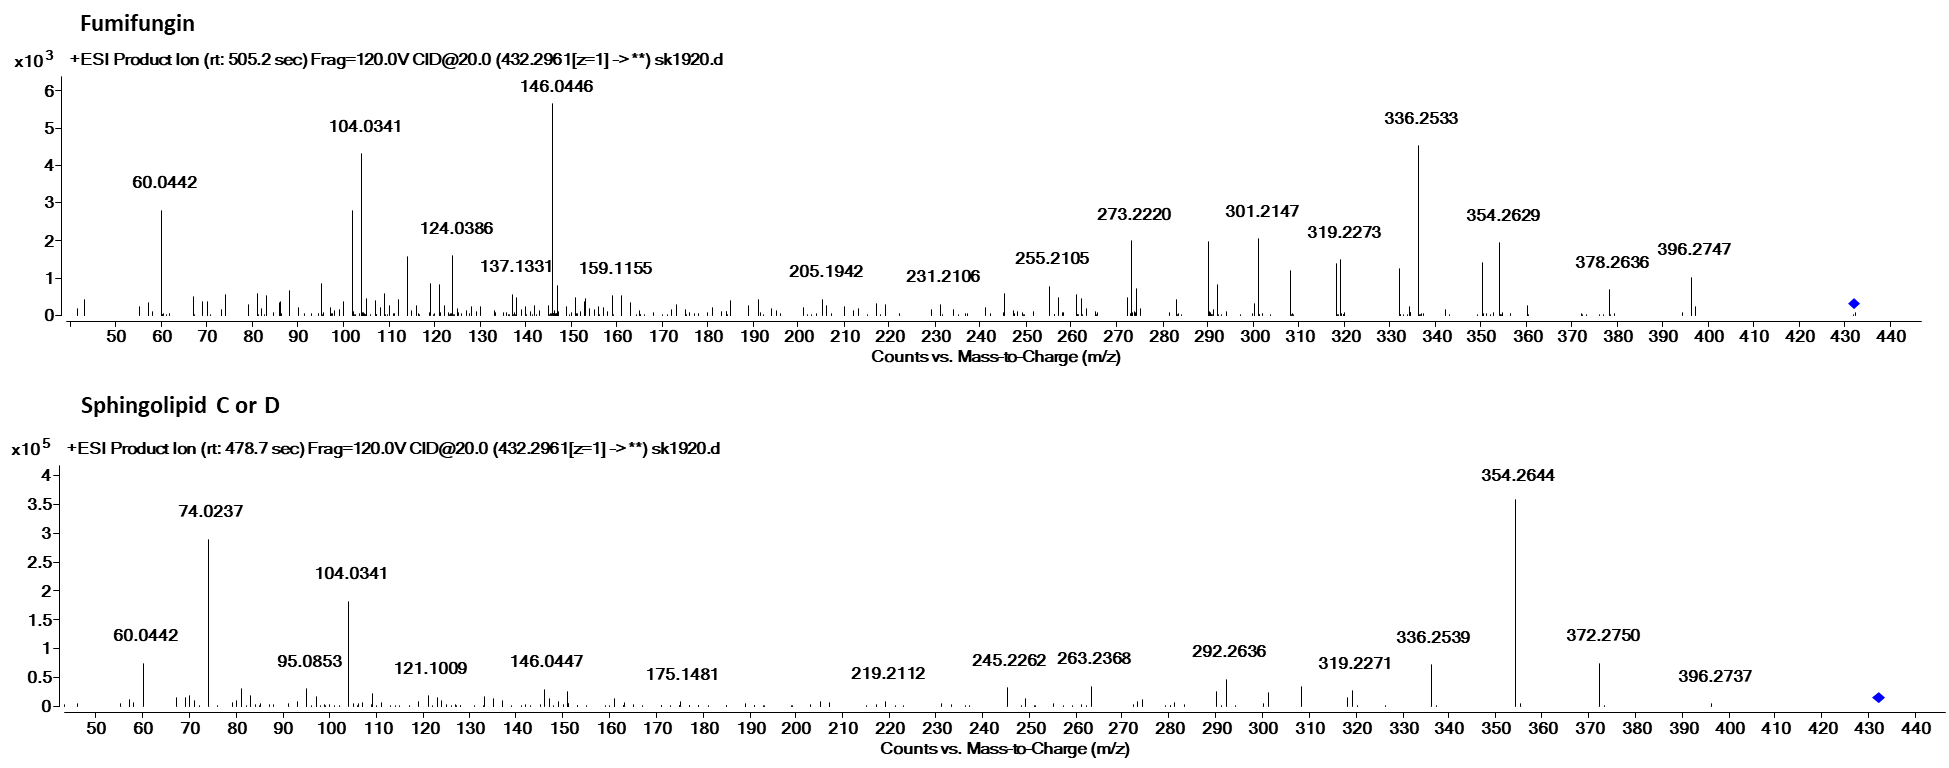


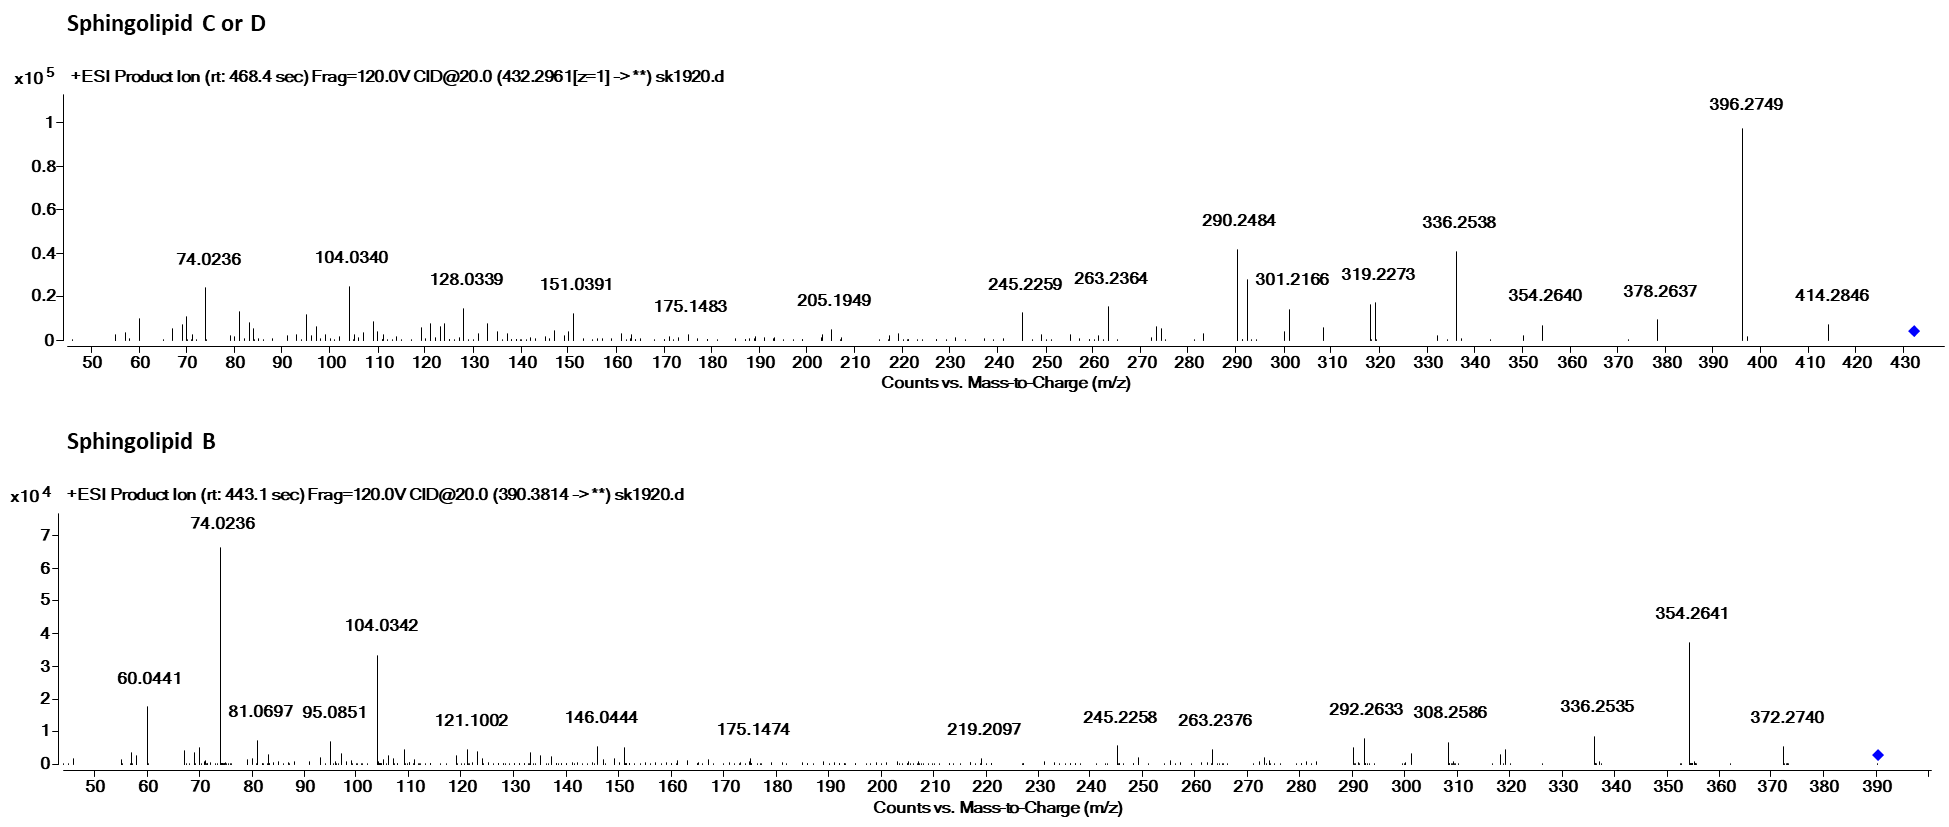


**Figure S7.** High resolution MS/MS spectra of fumifungins at 20 eV.


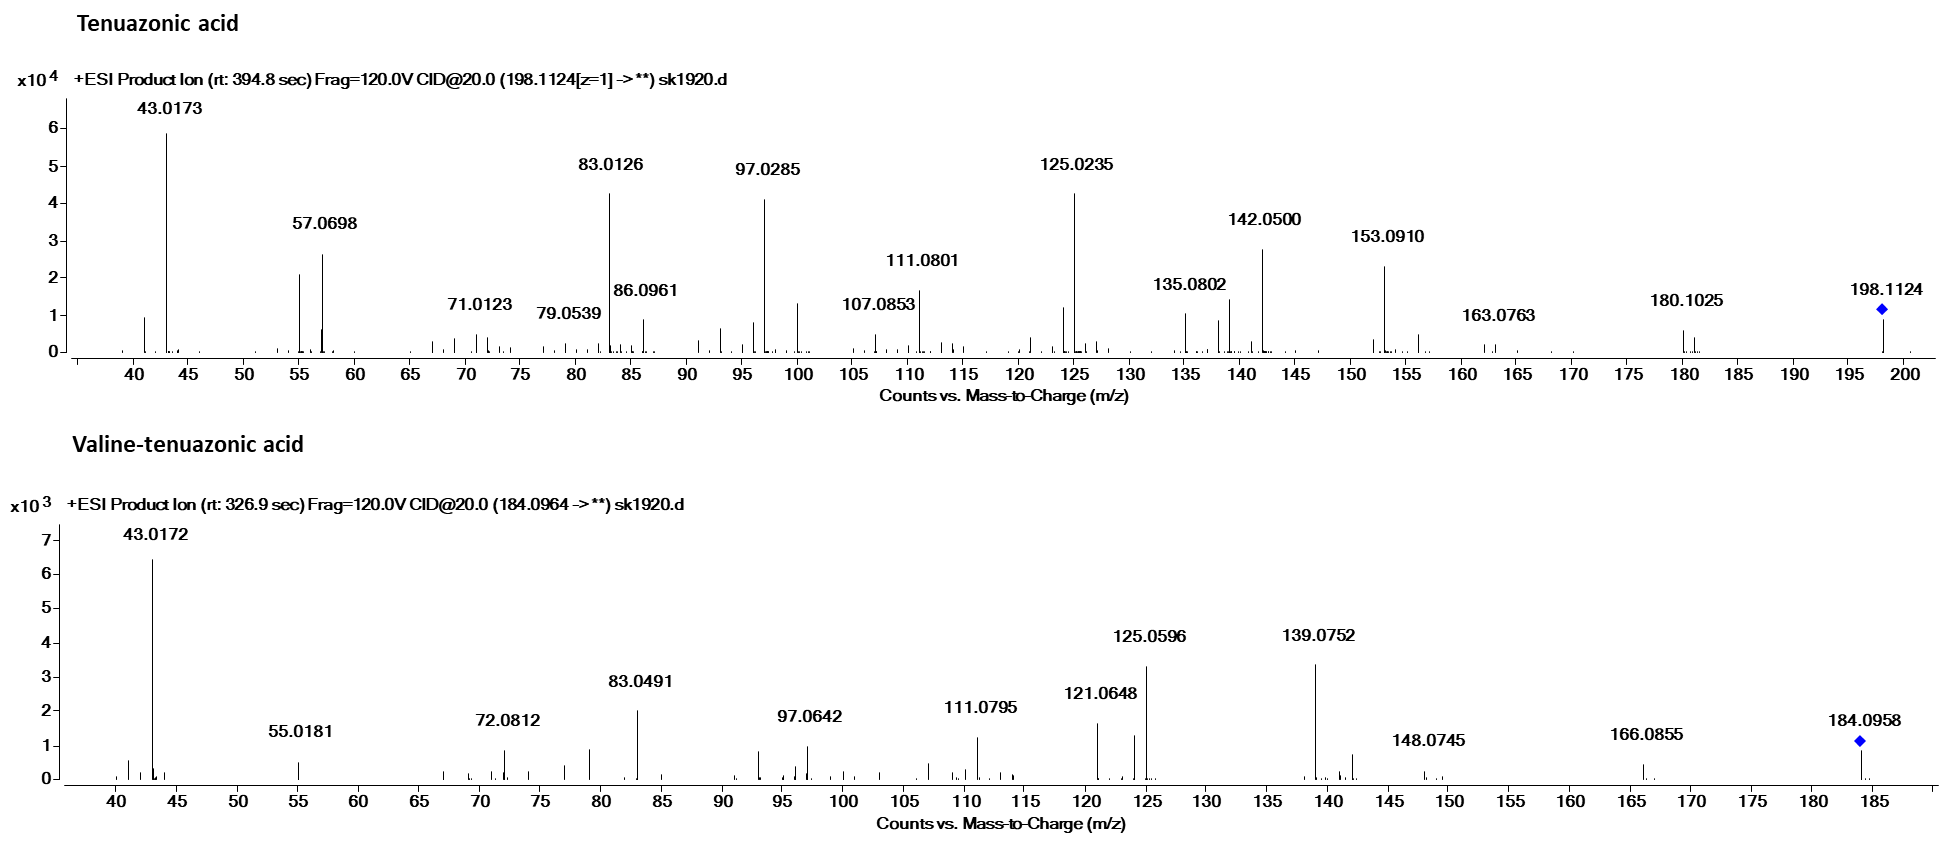


**Figure S8.** High resolution MS/MS spectra of tenuazonic acids at 20 eV.


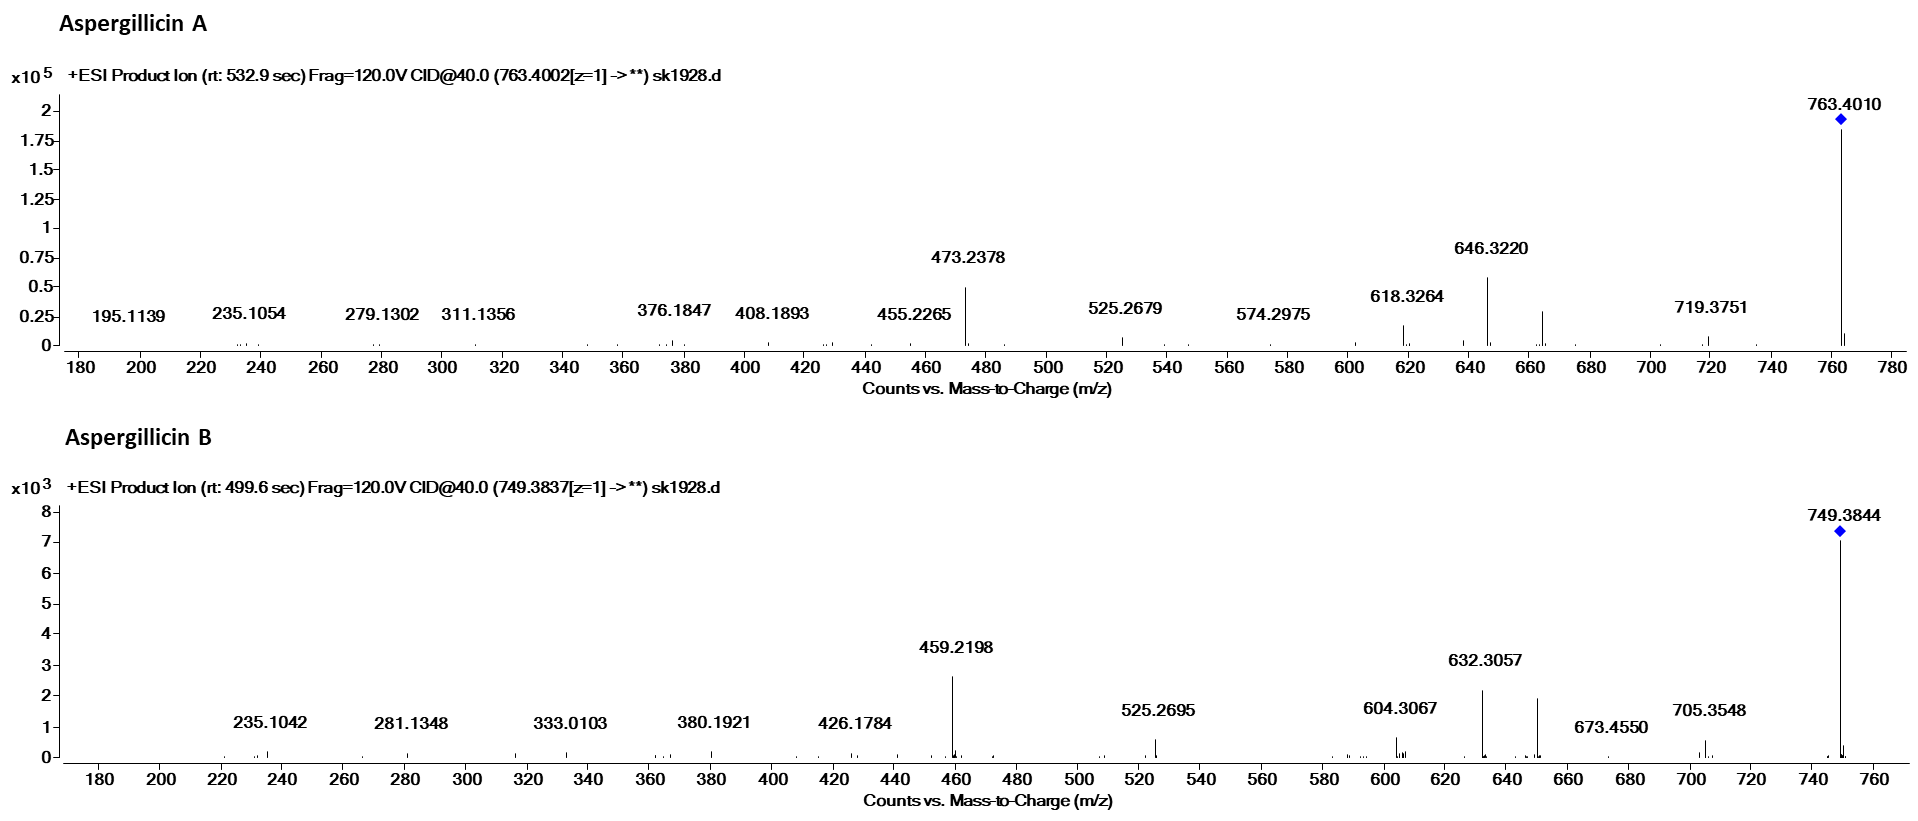


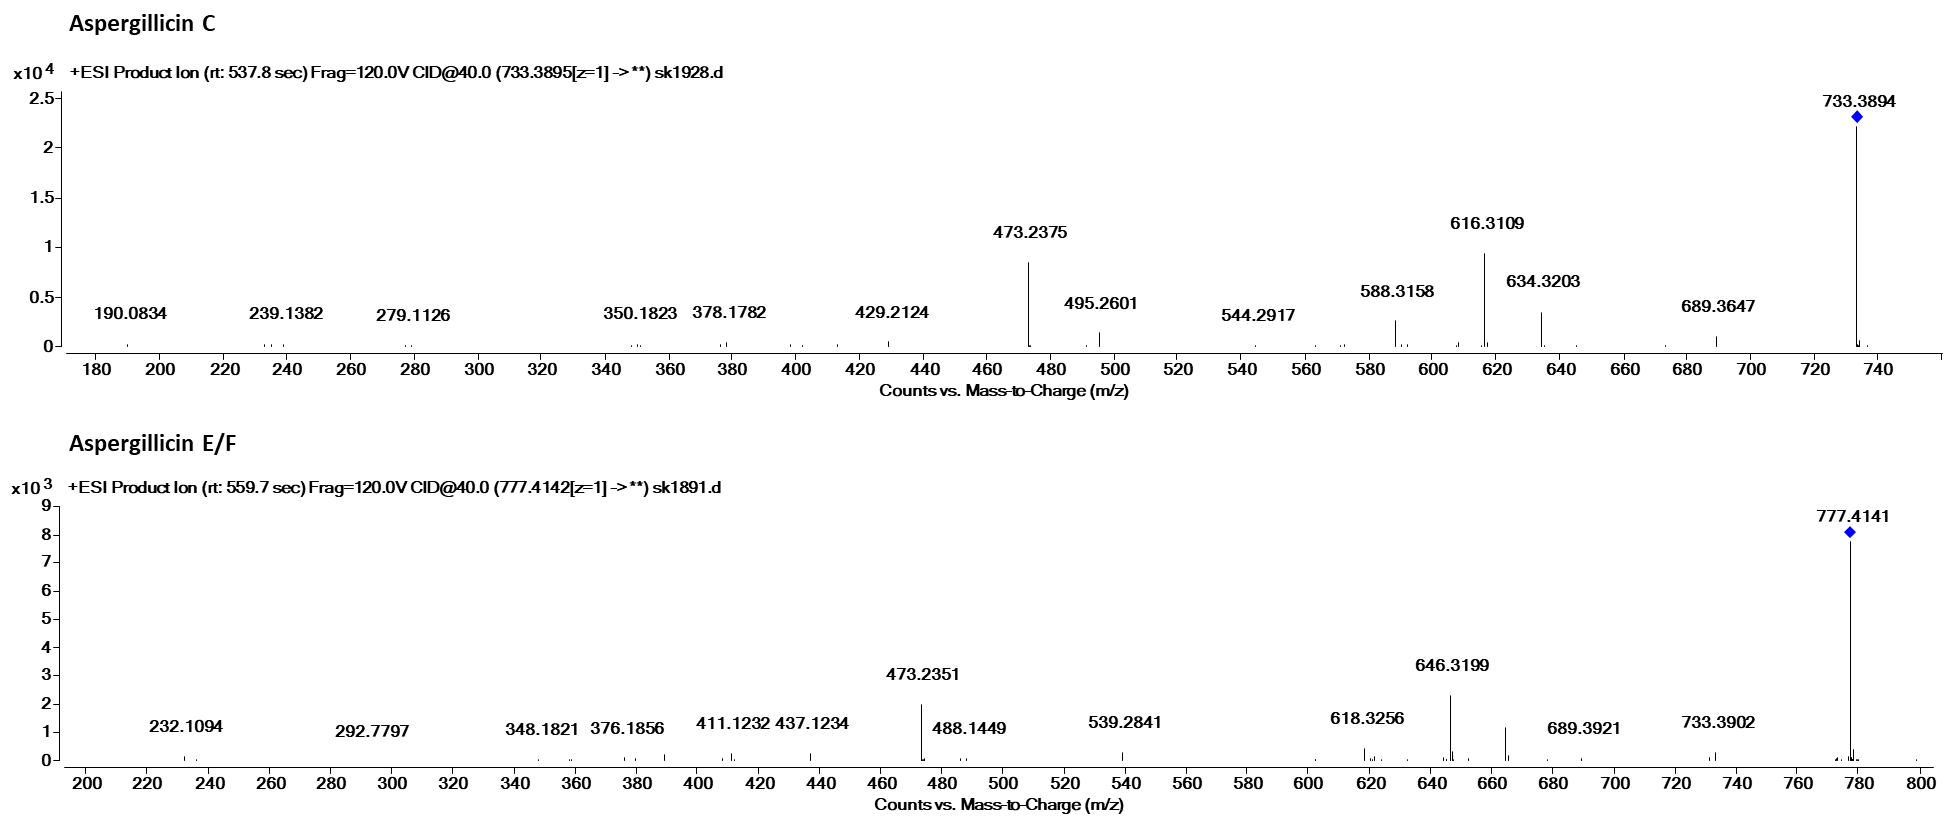


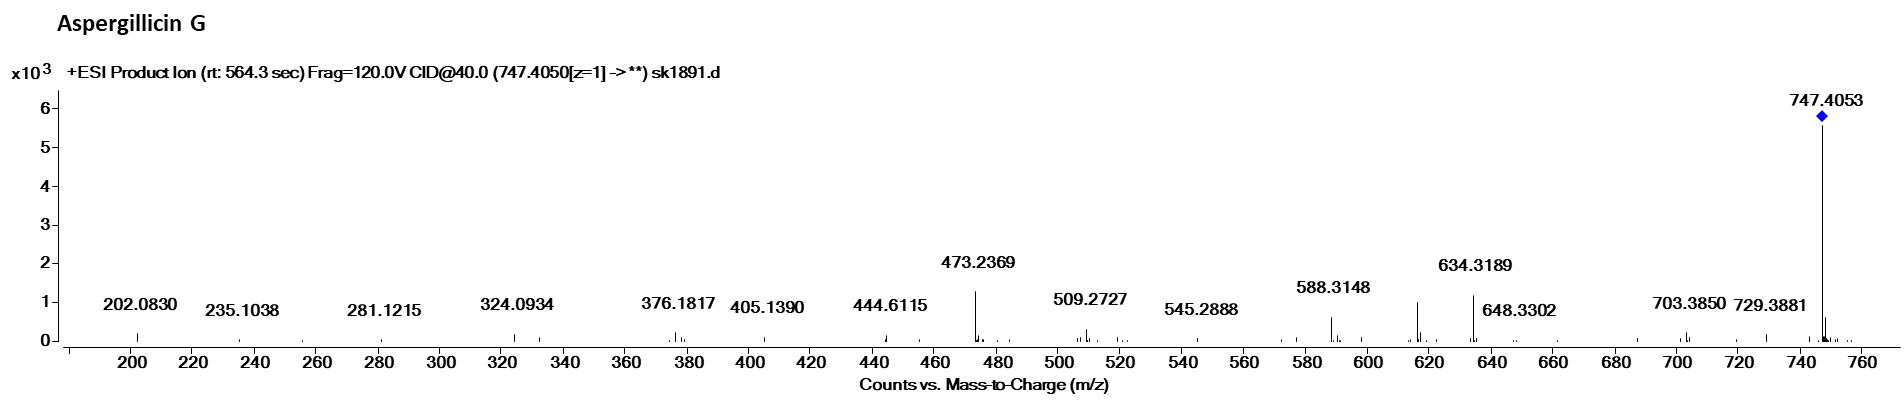


**Figure S9.** High resolution MS/MS spectra of aspergillicins at 40 eV.


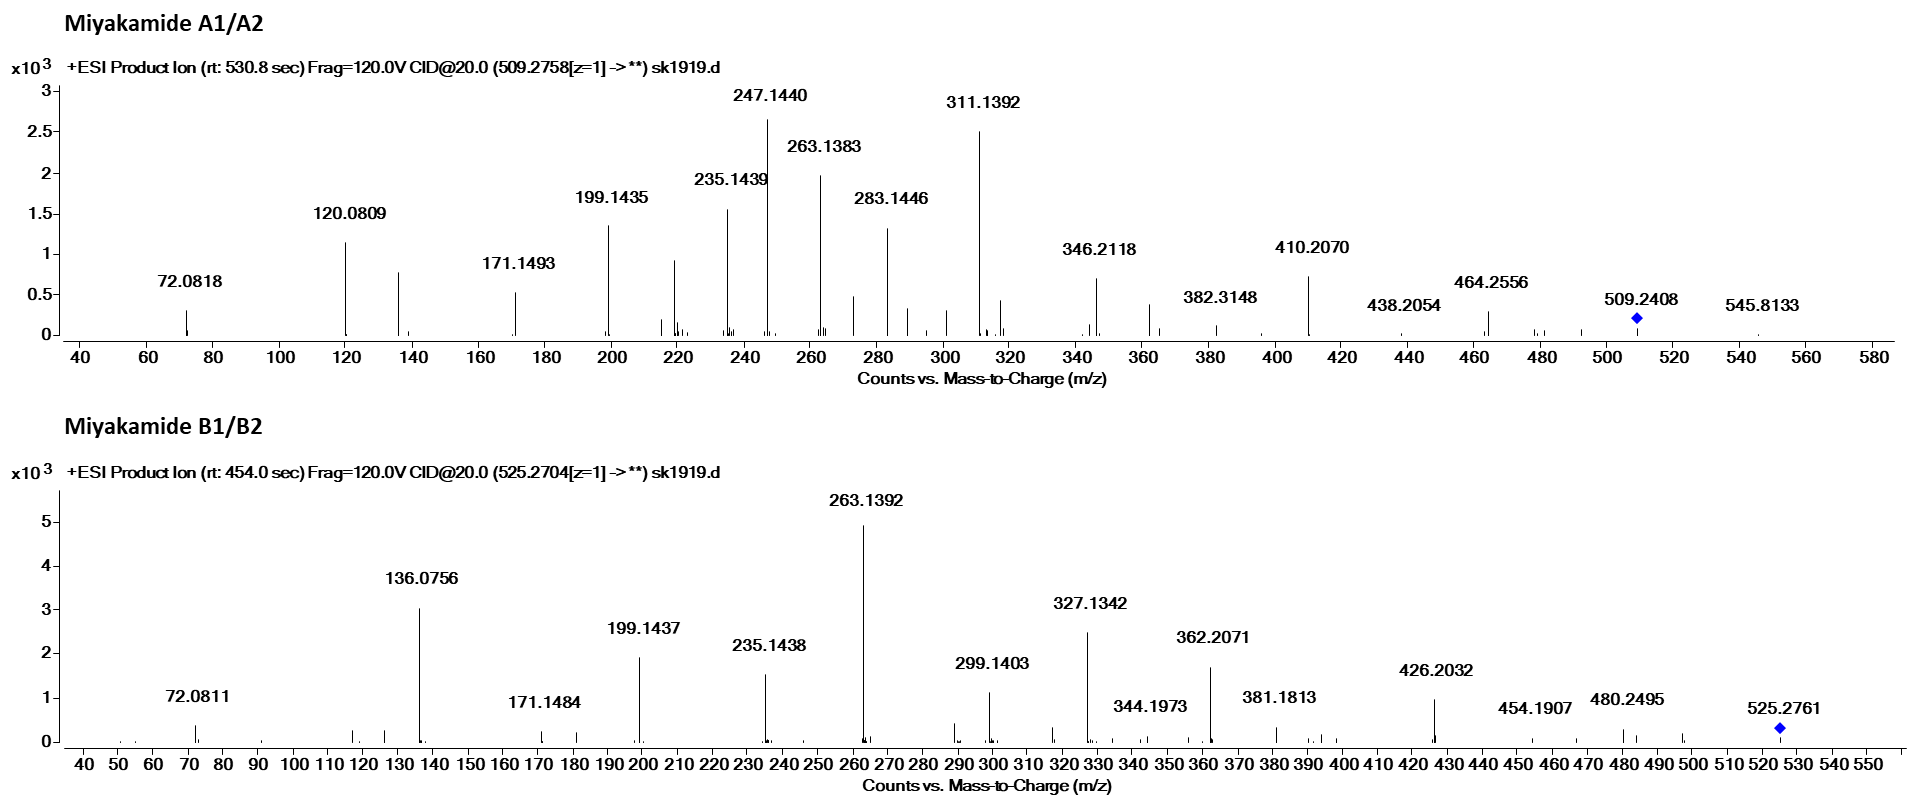


**Figure S10.** High resolution MS/MS spectra of miyakamides at 20 eV.


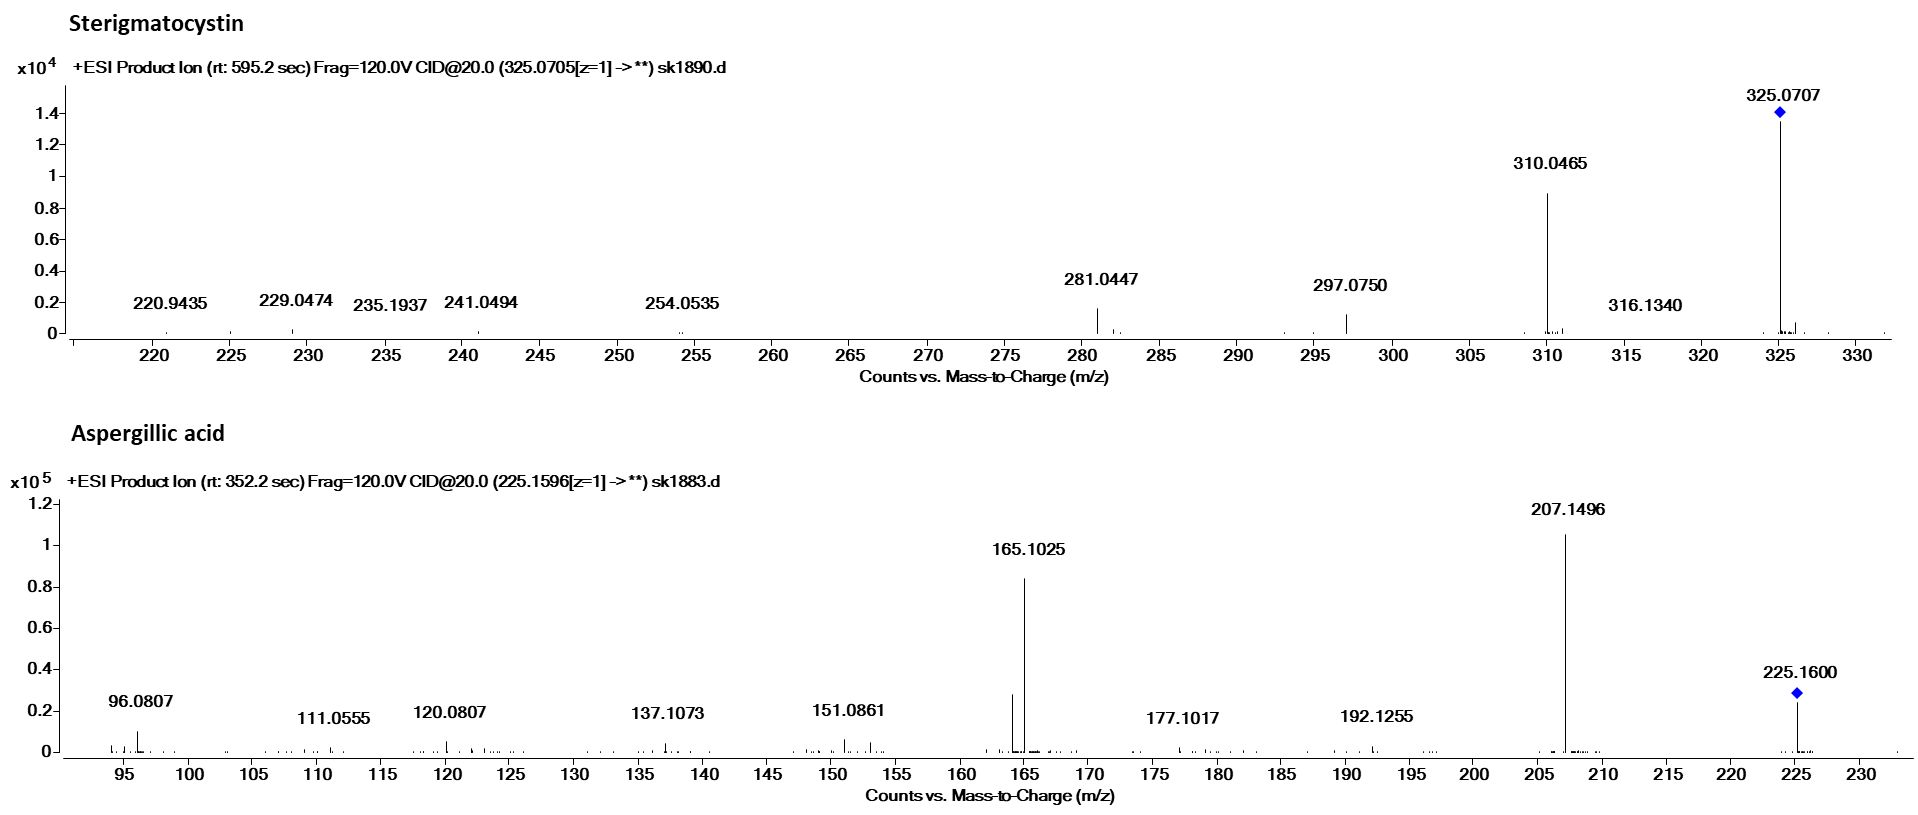


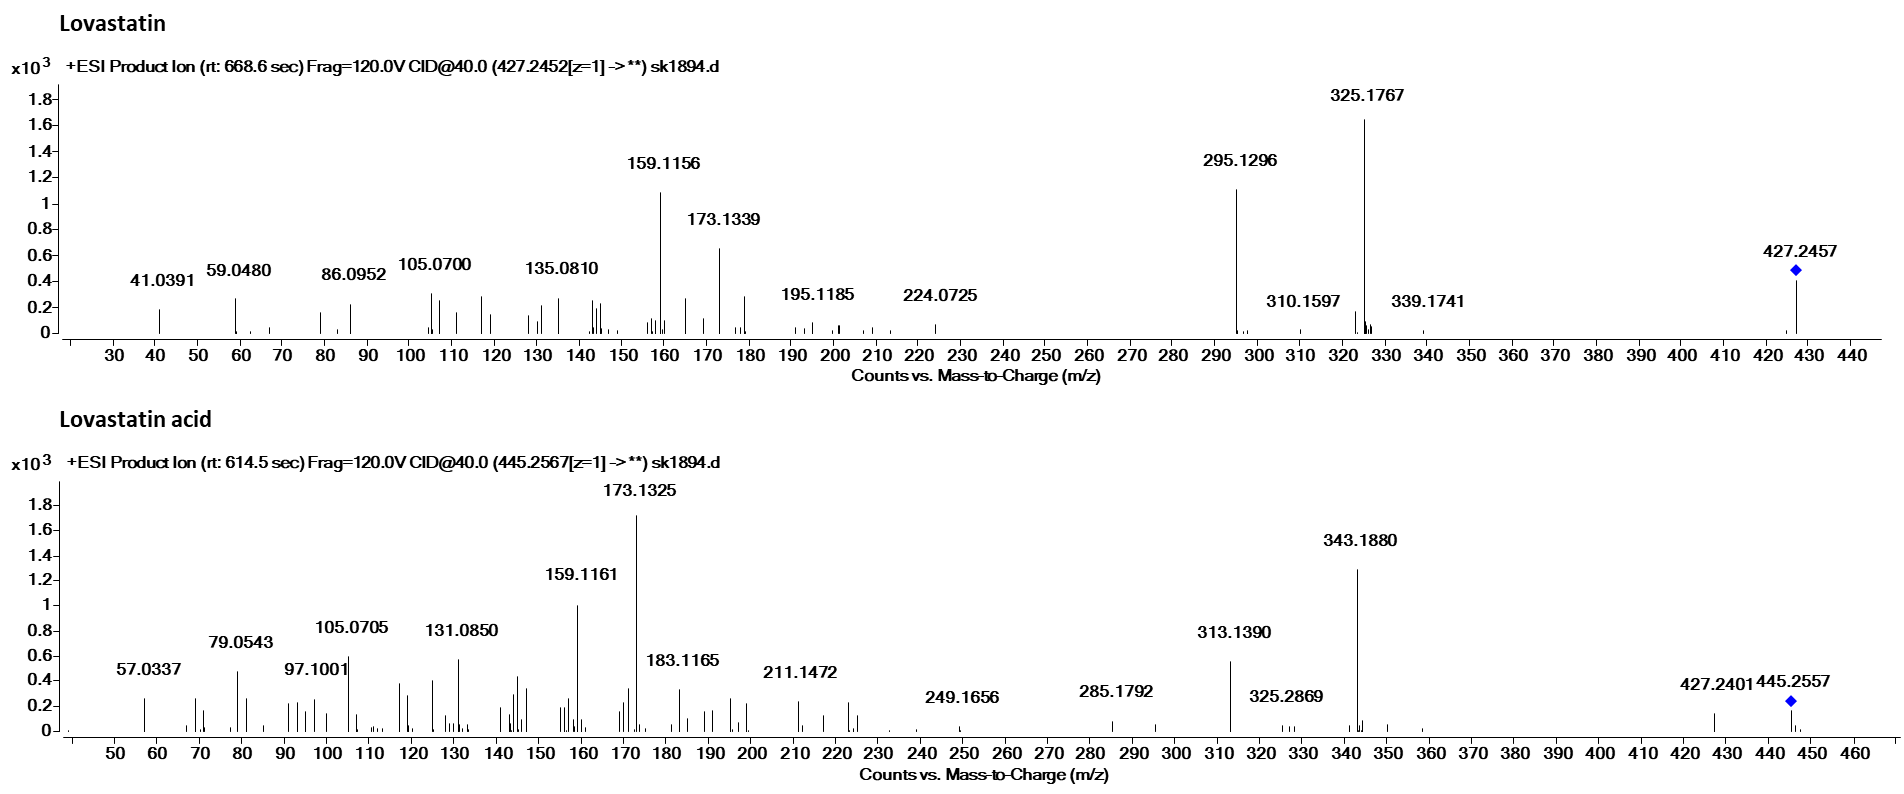


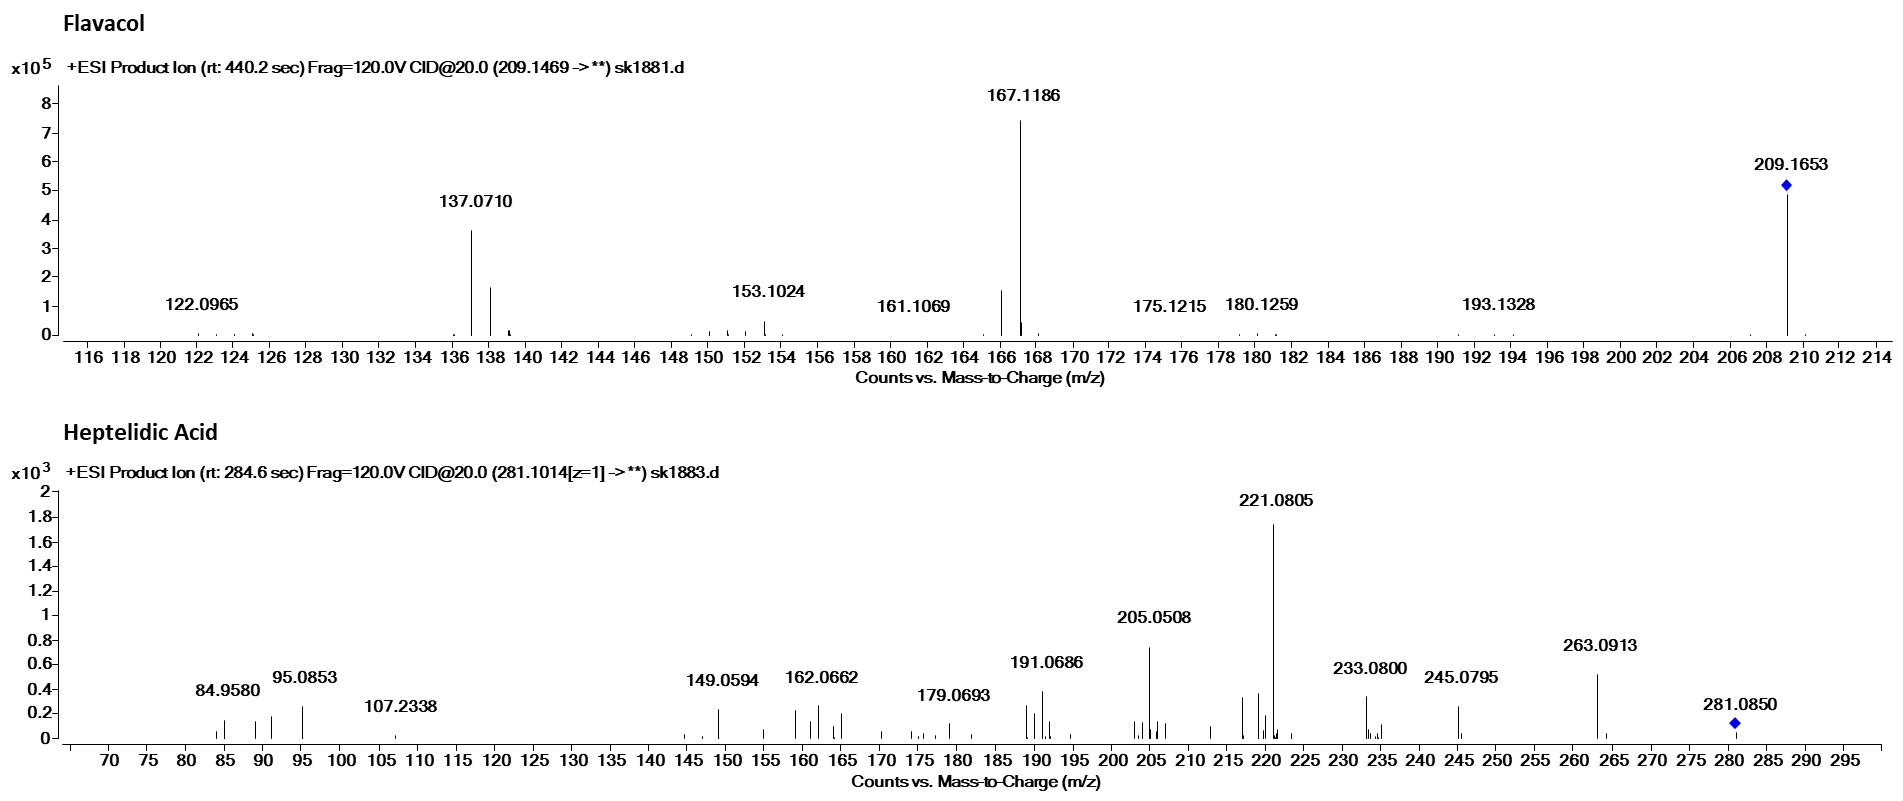


**Figure S11.** High resolution MS/MS spectra of some representative metabolites at 20 eV.
